# Supplementary material for: Oil Spill and Socioeconomic Vulnerability in Marine Protected Areas
Source: Frontiers journal article supplement (doi:10.3389/fmars.2022.859697), 2022-05-20
Supplement: Table_1.XLSX [file Table_1.XLSX]

## Sheet: IV
			PE - Tamandaré				PE - São José da Coroa Grande				PE - Rio Formoso				RN - Baía Formosa				RN - Macau - Diogo Lopes, Barreiras e Sertãozinho				RN - Rio do Fogo - Zumbi				RN - Touros - Cajueiro				AL - Barra de Santo Antônio				AL - Japaratinga				AL - Maragogi				AL - Paripueira				AL - São Miguel dos Milagres
Level of Exposure	Setor econômico	Economic Activity	8KM	16KM	25KM	VI	8KM	16KM	25KM	VI	8KM	16KM	25KM	VI	8KM	16KM	25KM	VI	8KM	16KM	25KM	VI	8KM	16KM	25KM	VI	8KM	16KM	25KM	VI	8KM	16KM	25KM	VI	8KM	16KM	25KM	VI	8KM	16KM	25KM	VI	8KM	16KM	25KM	VI	8KM	16KM	25KM
High Exposure	Food	Restaurants	29	2	1	22.1333	6			3.4	9			6	8	1		7.13333	7			5.13333	10		1	7.56667	16	1		12.4	19	3		15.9333	18	1		13.2333	65	4	1	46.2667	14	1		10.4333	6	6	11
	Food	Bars	10			7	8			4.53333	4	1		3.26667	3			2.4	2	1		2.13333	1			0.7	3	1		2.86667	5			3.66667				0	17			11.3333	4			2.8	3	1
	Food	Snack Bars	27	2	1	20.7333				0	3	1		2.6	10			8	3	1		2.86667	7			4.9	9	1		7.26667	7			5.13333	5	5		6.66667	27			18	13	1		9.73333	4	3	11
	Food	Beach huts	9			6.3				0				0			1	0.666667				0	4			2.8				0	3		1	2.8	1			0.7	1			0.666667	4	3		4.7	1
	Food	Markets and fish trade	17			11.9	7		1	4.4	10	2		7.86667	11			8.8	7			5.13333	8	2		6.86667	15			11	9	2	1	8.53333	9	2		7.56667	14	3		11.1333	12	1		9.03333	2		6
	Food	Ice cream parlor	6			4.2				0	1			0.666667	2			1.6	2			1.46667	1			0.7	2			1.46667	2			1.46667	4			2.8	10			6.66667	1	1		1.33333	1		2
	Food	Barbecue restaurant	2			1.4				0	1			0.666667	1			0.8	1			0.733333	1			0.7	4	1		3.6				0	3			2.1	7			4.66667	2			1.4			3
	Food	Sweetshop	3			2.1	1			0.566667				0	3			2.4				0				0	3	1		2.86667	1			0.733333		1		0.633333	4			2.66667	1			0.7
	Food	Coffee shop	1			0.7				0	2			1.33333				0				0				0	1			0.733333				0				0	2	1		1.93333				0		2
	Food	Bakeries	3			2.1				0	4			2.66667	1			0.8	3	1		2.86667				0	4			2.93333	3			2.2				0	5			3.33333	1	1		1.33333		1
	Accommodation	Hotel	11			7.7	2			1.13333	1			0.666667				0				0				0	1		1	1.33333				0	14			9.8	7			4.66667	1			0.7	4	1
	Accommodation	Inn	41	1		29.3333		4	5	4.16667				0	19			15.2	4			2.93333	9	1		6.93333	5	3		5.66667	5			3.66667	39	1		27.9333	86	3	1	59.6667	10	1	1	8.2	15	9	20
	Accommodation	Resort	2	1		2.03333				0				0				0				0				0		1		0.666667			3	1.8				0	1			0.666667				0
	Accommodation	Hostel	2			1.4				0				0				0				0				0				0	2			1.46667	1			0.7	21			14				0	1		1
	Accommodation	Beach House	14			9.8	1			0.566667				0	1			0.8				0				0	2	3		3.46667	2			1.46667	1			0.7	10			6.66667	3			2.1	3	2	2
	Accommodation	Ranch				0				0				0				0				0				0			1	0.6				0				0	1			0.666667				0
	Accommodation	Apartment	17	3		13.8				0	1			0.666667				0				0	3			2.1	1			0.733333	1			0.733333	2			1.4	12			8	1	1	1	1.9	1	1	7
	Accommodation	Chalet	7			4.9			1	0.433333				0	3			2.4				0	1	1		1.33333				0	3	1		2.86667	1			0.7	6			4	1			0.7	3	1	5
	General services of high exposure	Real Estate Activity	3			2.1		4		2				0				0				0				0				0	1		1	1.33333				0	1			0.666667	1			0.7	1		2
	General services of high exposure	Travel and tourism	2			1.4				0				0	1			0.8				0				0	1			0.733333				0	1			0.7	8			5.33333	1			0.7	1	1
	General services of high exposure	Water transport, sea terminal or port customs	0			0				0				0				0				0				0				0				0				0				0				0
	Tourism and leisure	Tourist spots	15	1		11.1333	1			0.566667	3			2	5			4	6	1	1	5.66667	4	1		3.43333	5	1	2	5.53333	3		1	2.8	9			6.3	17			11.3333	6	1		4.83333	2		4
	Tourism and leisure	Places for sports and orchestration or musical activity	2			1.4	1	1		1.06667				0	5			4				0	1			0.7	2			1.46667				0				0	3			2	1			0.7
	Tourism and leisure	Parks, campsites and clubs	0			0				0				0				0				0			1	0.566667	1			0.733333	1			0.733333	1			0.7	3			2	1			0.7	2
	Tourism and leisure	Buggy rides				0				0				0				0				0		1		0.633333				0				0				0				0				0
	Tourism and leisure	Tourist farms				0				0				0				0				0				0				0				0				0				0				0	1
	Tourism and leisure	Museum or theater				0		1		0.5	1			0.666667				0				0				0				0				0				0				0				0
	Stores of high exposure	Aquaculture				0				0				0				0				0				0				0				0				0				0				0
	Stores of high exposure	Handicraft or embroidery	3			2.1				0	1			0.666667				0				0				0				0			0	0				0	7	2		5.86667				0
	Stores of high exposure	Food industry	4			2.8				0				0				0				0				0				0			0	0				0	2	1		1.93333	1			0.7
Low Exposure	Automotive services	Tire or welding shop				0				0	1			0.533333				0				0				0	2			1.2			1	0.466667				0	1			0.533333				0
	Automotive services	Car wash		1		0.5				0				0	1			0.666667				0				0	1			0.6				0				0				0	1			0.566667
	Automotive services	Workshop and auto parts (car and motorcycle parts)	2			1.13333			1	0.3	8			4.26667				0	2			1.2	2			1.13333	4	2		3.46667	1			0.6		2		1	3	2		2.53333	1			0.566667
	Esthetic services	Beauty salon and manicure	5			2.83333			1	0.3	1			0.533333	2			1.33333				0	1			0.566667	5			3	1			0.6				0	1			0.533333	1			0.566667	1		1
	Esthetic services	Tanning salon				0				0				0				0				0				0				0				0				0				0				0
	Esthetic services	SPA, beauty or hair removal clinic	0			0				0				0				0				0	1	1		1.06667				0				0				0				0				0
	Esthetic services	Gym and/or yoga	2			1.13333				0				0				0				0				0				0				0				0	2			1.06667				0
	Esthetic services	Barber shop	2			1.13333				0				0				0				0				0				0				0				0	1			0.533333				0	1
	Esthetic services	Tattoo parlor				0				0				0				0				0				0				0				0				0				0				0
	General services of low exposure	Gas stations	1	2		1.56667			1	0.3	3	1		2.06667	1			0.666667				0		1		0.5	3			1.8			2	0.933333			1	0.433333	5	1		3.13333	2	1	1	2.06667		1	1
	General services of low exposure	Educational institutions (including universities)	5			2.83333		1		0.366667	3			1.6	2			1.33333				0				0	5			3	4			2.4				0	3			1.6	1			0.566667
	General services of low exposure	NGO, foundation, association or council	2			1.13333		1		0.366667				0				0				0				0				0				0				0	2	1		1.53333				0
	General services of low exposure	Health center, hospital, emergency care units, clinic or dentist	4		1	2.7				0				0				0	1			0.6				0	2			1.2				0		1		0.5	3			1.6		1		0.5			1
	General services of low exposure	Advertising studio or agency	0			0				0	1			0.533333				0				0				0				0				0				0				0				0
	General services of low exposure	Financial, legal, insurance or business activity	0			0				0	1			0.533333				0				0				0				0				0				0	1			0.533333	1			0.566667
	General services of low exposure	Events, nightclubs, catering or other entertainment activities	0			0				0	2			1.06667				0				0				0	1			0.6	2			1.2				0	1			0.533333	1			0.566667	1
	General services of low exposure	Post office, registry office, forum or newspaper	1			0.566667			1	0.3	2			1.06667	2			1.33333				0	2			1.13333	3			1.8	1			0.6	1	1		1.06667	2	1		1.53333	1			0.566667		2
	General services of low exposure	Engineering services, Technical support or internet	3			1.7				0				0				0				0				0	2			1.2				0				0	2			1.06667	1			0.566667			1
	General services of low exposure	Security				0				0				0				0				0				0	1			0.6				0				0				0				0
	General services of low exposure	Driving school				0				0				0				0				0				0	1			0.6				0				0	3			1.6				0
	General services of low exposure	Bank or lottery	2			1.13333				0	5			2.66667				0				0	1			0.566667	4			2.4	1			0.6				0	3	1		2.06667	1			0.566667		1
	General services of low exposure	Laundry				0				0				0				0				0				0				0				0				0				0				0
	General services of low exposure	Telecommunication	1			0.566667				0	1			0.533333	1			0.666667				0				0	3	1		2.33333				0	1			0.566667	1			0.533333				0
	General services of low exposure	Parking	1			0.566667				0				0				0				0				0				0				0				0	1			0.533333	1			0.566667
	General services of low exposure	Power, mining or water treatment stations	1			0.566667				0				0				0				0				0	1			0.6	1			0.6		1		0.5		1		0.466667	1			0.566667
	General services of low exposure	Police station, police command, army or air force	1			0.566667				0				0	1			0.666667				0				0	1			0.6				0				0	3			1.6	1			0.566667
	General services of low exposure	Toilet rentals, cleaning services or garbage collection	0			0				0	1			0.533333				0				0				0				0				0				0	1			0.533333				0
	General services of low exposure	Transportation or logistics services	4			2.26667		1		0.366667	2			1.06667				0				0				0	4			2.4				0	5	1		3.33333	2	1		1.53333				0			2
	General services of low exposure	Government or union headquarters or department	4			2.26667				0	3			1.6	3			2	2			1.2	1			0.566667	4			2.4	2			1.2		1		0.5	1			0.533333	1			0.566667			1
	Stores of low exposure	Fashion, cosmetics, jewelry or shoe stores	12			6.8		2	1	1.03333	15			8	3			2	3			1.8	5		1	3.26667	16			9.6	5		0	3	2	1		1.63333	15	1		8.46667	2			1.13333	1		1
	Stores of low exposure	Children's stores				0				0				0				0				0				0	2			1.2				0				0				0				0
	Stores of low exposure	Furniture, household goods, or appliances	2			1.13333			4	1.2				0	1			0.666667				0	1			0.566667	5			3			0	0				0	1			0.533333				0			1
	Stores of low exposure	Electronics, musical instrument, or game stores	3			1.7				0	2			1.06667	1			0.666667				0				0	3			1.8	2		0	1.2		1		0.5	2			1.06667	1			0.566667
	Stores of low exposure	Technology company				0				0				0				0				0	1			0.566667	1			0.6	2		0	1.2				0				0	2	1		1.63333		2
	Stores of low exposure	Stationery, printing, book, or party supply stores	1			0.566667				0				0				0				0				0	1			0.6			0	0				0	1			0.533333				0			1
	Stores of low exposure	Bicycle and quad bike stores	1			0.566667				0				0				0				0				0				0			0	0				0				0		1		0.5
	Stores of low exposure	PET stores				0				0				0				0				0				0	2		1	1.66667			0	0				0				0				0
	Stores of low exposure	Flower, garden and lawn supply stores	0	1		0.5				0				0				0				0				0				0		1	0	0.533333				0		1		0.466667				0
	Stores of low exposure	Gas distributor	3			1.7				0				0				0				0				0	1			0.6	3	1	0	2.33333	1			0.566667	1			0.533333	1			0.566667		1
	Stores of low exposure	Beverage, ice, liquor or tobacco vendor	0			0				0				0				0				0				0	1			0.6			0	0				0				0				0
	Stores of low exposure	Pool or beach entertainment items	4			2.26667	1		2	1.03333	4			2.13333	2			1.33333	1			0.6				0	6			3.6	1	1	0	1.13333				0	2			1.06667	1			0.566667
	Stores of low exposure	Construction materials, parts and hardware or blasting	5			2.83333				0	6			3.2	1			0.666667				0				0	5			3	1		0	0.6	2			1.13333	3			1.6	3			1.7
	Stores of low exposure	Pharmacy or supplement store				0			1	0.3				0				0				0				0				0	1		0	0.6				0	1			0.533333	1			0.566667
	Stores of low exposure	Surf store, fishing or hunting supplies	3			1.7				0	1			0.533333				0				0				0	2			1.2			0	0				0				0				0	1
	Stores of low exposure	Optics				0				0				0				0				0				0				0	1		0	0.6				0				0				0
	Stores of low exposure	Concessionaires, boat and motorboat stores	0			0				0				0				0				0				0				0			0	0				0				0				0
	Stores of low exposure	Religious articles store	1			0.566667				0				0				0				0				0	2			1.2			0	0				0				0				0
	Stores of low exposure	Variety				0		1		0.366667		2		0.933333				0	2			1.2	1			0.566667	4			2.4			0	0				0	5			2.66667				0
	Religious institutions		19	1		11.2667		3	6	2.9	16	1		9	13			8.66667	10		1	6.46667	8	1		5.03333	17	2		11.2667	15	3	1	11.0667	3	3		3.2	13			6.93333	8	2		5.53333	3	4	4
TOTAL			325	15	3	225.233	28	19	25	32.4667	119	8	0	73.2	107	1	1	82.4667	56	4	2	42	74	9	3	55.4667	190	18	5	138.2	111	12	11	88.8	124	22	1	97.5667	423	24	2	284.667	113	17	3	86.1	59	39	88
[truncated: 105 more columns]
